# Supplementary material for: Inhibition of lithium dendrite growth with highly concentrated ions: cellular automaton simulation and surrogate model with ensemble neural networks
Source: Royal Society of Chemistry journal article supplement (doi:10.1039/d1me00150g), 2021-12-13
Supplement: d1me00150g1.pdf [file d1me00150g1.pdf]

# Inhibition of Lithium Dendrite Growth with Highly Concentrated Ions: Cellular Automaton Simulation and Surrogate Model with Ensemble Neural Networks

## Supplementary Information

Tong Gao<sup>1</sup>, Ziwei Qian<sup>1</sup>, Hongbo Chen<sup>1,2</sup>, Reza Shahbazian-Yassar<sup>3</sup>, and Issei Nakamura<sup>1,\*</sup>

<sup>1</sup>Department of Physics, Michigan Technological University, Houghton, Michigan 49931, USA

<sup>2</sup>State Key Laboratory of Polymer Physics and Chemistry, Changchun Institute of Applied Chemistry, Chinese Academy of Science, Changchun, Jilin 130022, China

<sup>3</sup>Department of Mechanical and Industrial Engineering, University of Illinois at Chicago, Chicago, Illinois 60607, USA

(Dated: 18 October 2021)

In this supplemental material, we illustrate our experimental observation of lithium dendrite growth in a combination of 1M LiPF<sub>6</sub> in EC/DMC electrolyte and 10% ionic liquid [BMIM][TFSI]. Fig. S1 shows that the addition of the ionic liquid significantly suppresses lithium dendrite and makes the growth trend remarkably uniform in the lateral direction.

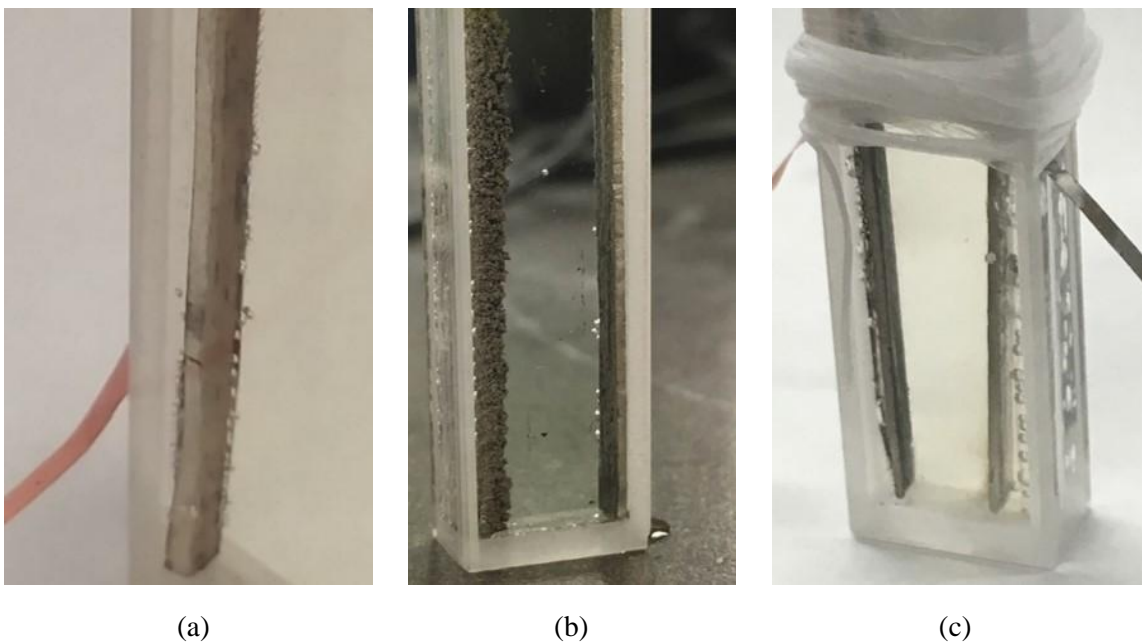

FIG. S1 Lithium dendrite growth. (a) Original Li foil, (b) lithium deposits under 1M LiPF<sub>6</sub> in EC/DMC, and (c) lithium deposits under 1M LiPF<sub>6</sub> in EC/DMC + 10% [BMIM][TFSI].

---

\* inakamur@mtu.edu
